# Supplementary material for: Highly sensitive mechano-optical strain sensors based on 2D materials for human wearable monitoring and high-end robotic applications
Source: Royal Society of Chemistry journal article supplement (doi:10.1039/d1tc03519c), 2021-11-18
Supplement: d1tc03519c1.pdf [file d1tc03519c1.pdf]

*Supporting Information for*

**Highly Sensitive Mechano-Optical Strain Sensor Based on 2D Material for Human Gaits Quality Monitoring and High End Robotic Applications**

Haris Khan<sup>a</sup>, Afaque Manzoor Soomro<sup>b,\*</sup>, Abdul Samad<sup>a</sup>, Irfanullah<sup>a</sup>, Muhammad Waqas<sup>a,\*</sup>, Hina Ashraf<sup>c</sup>,  
Saeed Ahmed Khan<sup>a</sup>, Kyung Hyun Choi<sup>b</sup>

<sup>a</sup>Department of Electrical Engineering, Sukkur IBA University, Pakistan,

<sup>b</sup>Department of Mechatronics Engineering, Jeju National University, Republic of Korea,

<sup>c</sup>Department of Ocean Science Engineering, Jeju National University, Republic of Korea

\*Correspondence and request for materials should be addressed to Muhammad Waqas & Afaque Manzoor Soomro (Email addresses: [mwaqas@iba-suk.edu.pk](mailto:mwaqas@iba-suk.edu.pk); [afaquemanzoor@gmail.com](mailto:afaquemanzoor@gmail.com))

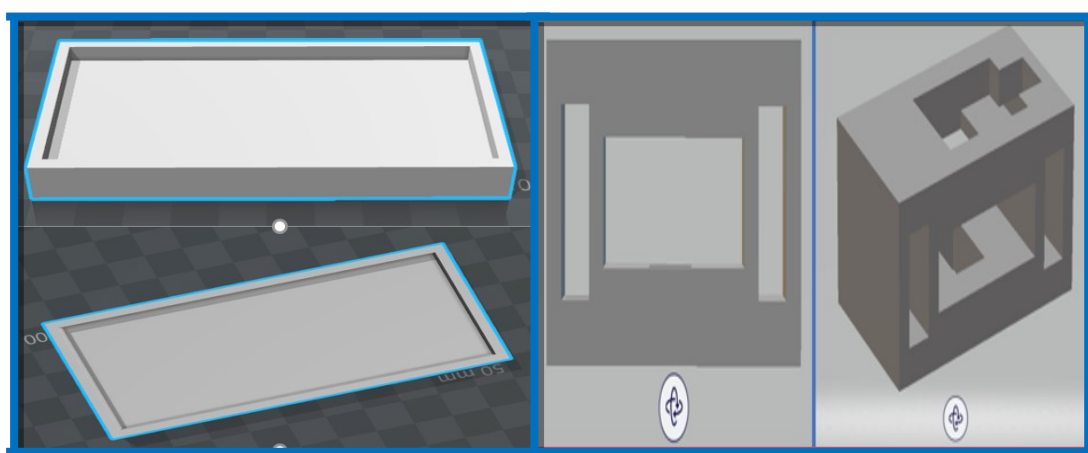

**Fig. S1 (a)** Design of casing for molding and casting of composite film **(b)** Design of LED-LDR assembly package.

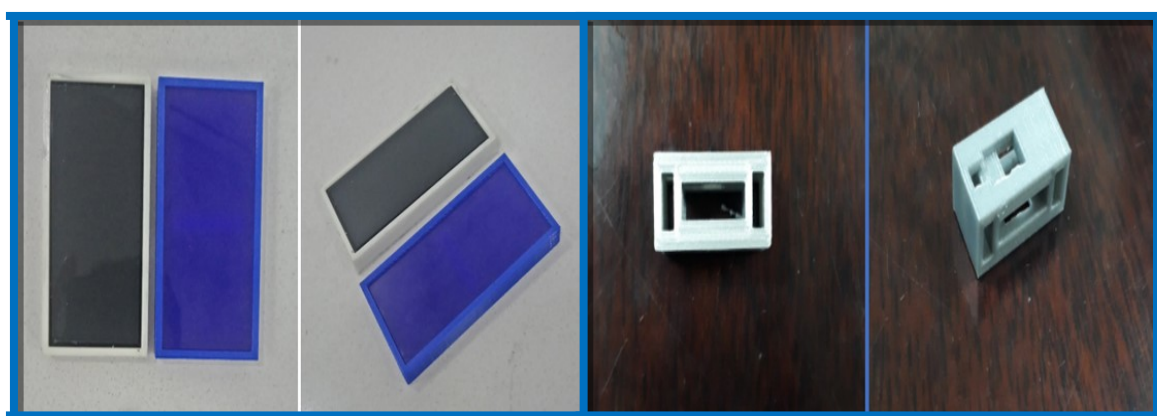

**Fig. S2** Real-time images showing the: **(a)** 3D printing of casing for molding and casting of Ecoflex/MoS<sub>2</sub> composite film **(b)** 3D design of LED-LDR assembly package.

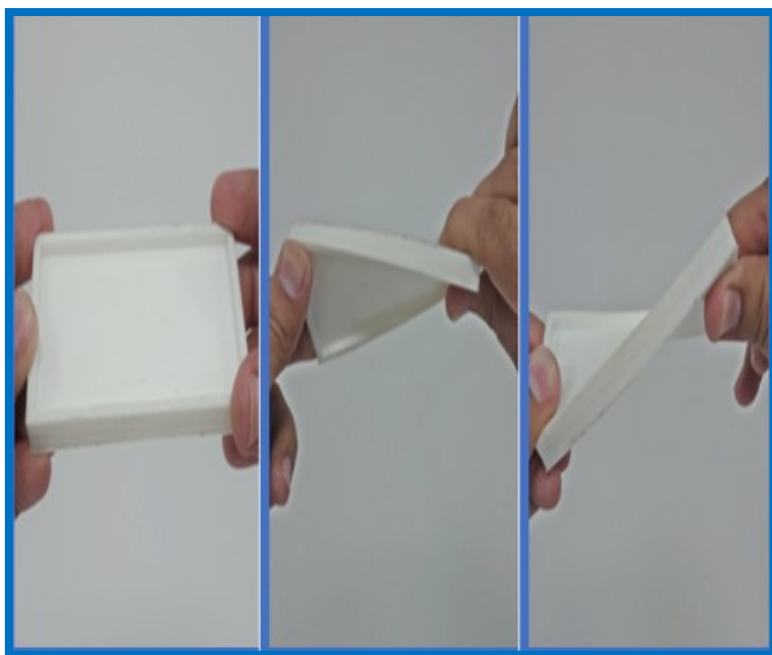

**Fig. S3** Real-time images showing the flexibility of 3D printed casing for molding and casting of Ecoflex/MoS<sub>2</sub> composite film.

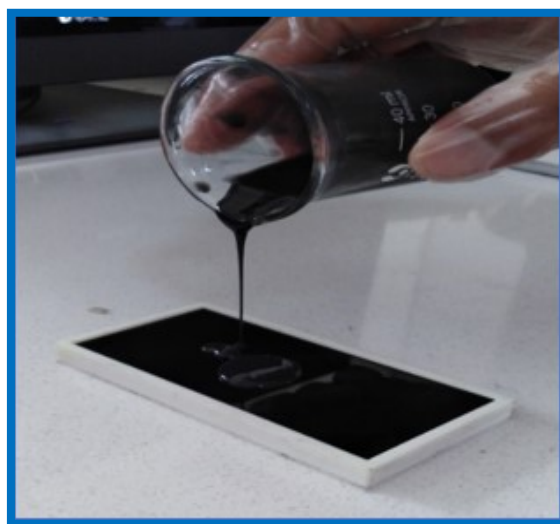

**Fig. S4** Real-time images showing the casting of Ecoflex/MoS<sub>2</sub> composite film.

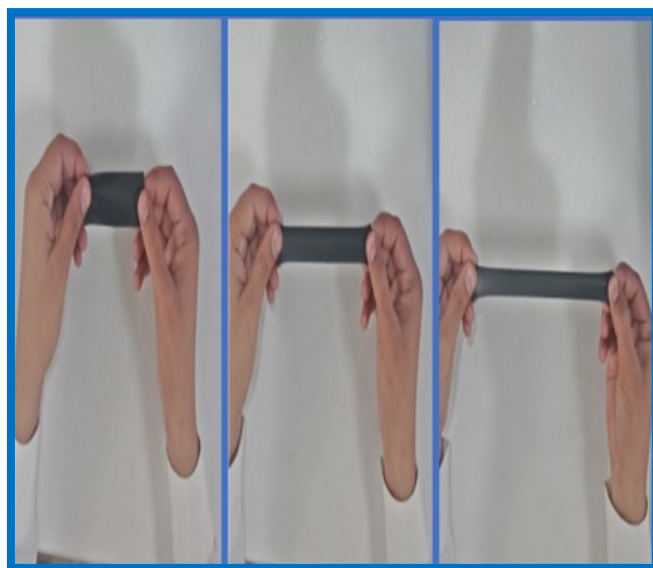

**Fig. S5** Real-time images showing the manual stretching capability of Ecoflex/MoS<sub>2</sub> composite film.

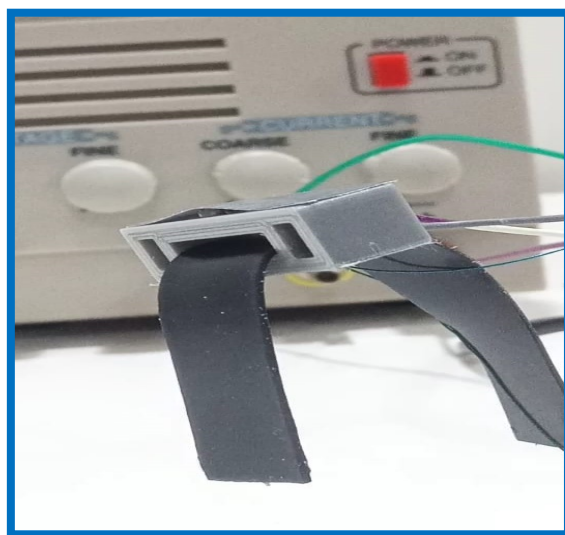

**Fig. S6** Real-time images depicting the fabrication of a single sensor package based on Ecoflex/MoS<sub>2</sub> composite film and LED-LDR arrangements.

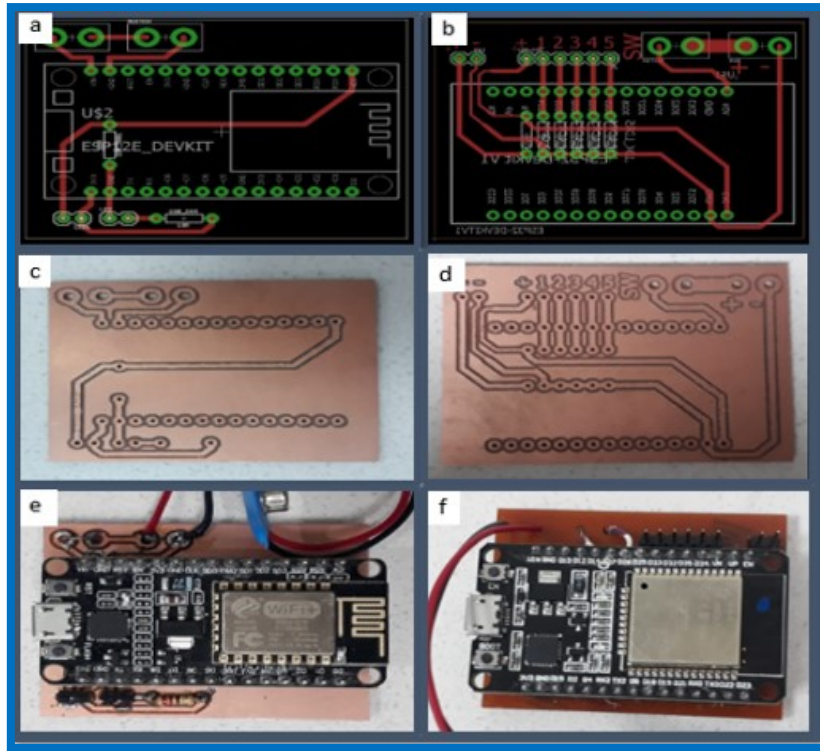

**Fig. S7 (a, b)** PCB design of hardware circuitry, **(c, d)** Printed PCB boards, and **(e, f)** real-time images of complete hardware circuitry for the acquisition of sensor data and remote monitoring.

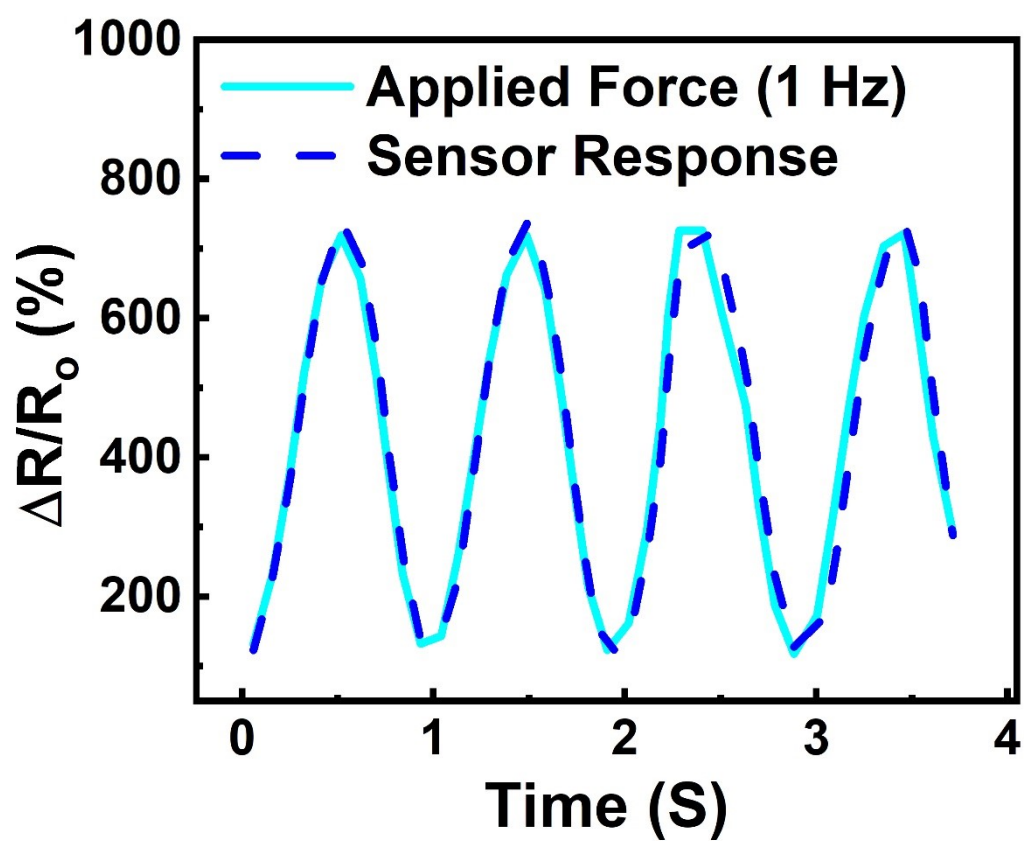

Fig. S8 Sensor response under uniaxial stretching at the rate of 1 Hz.

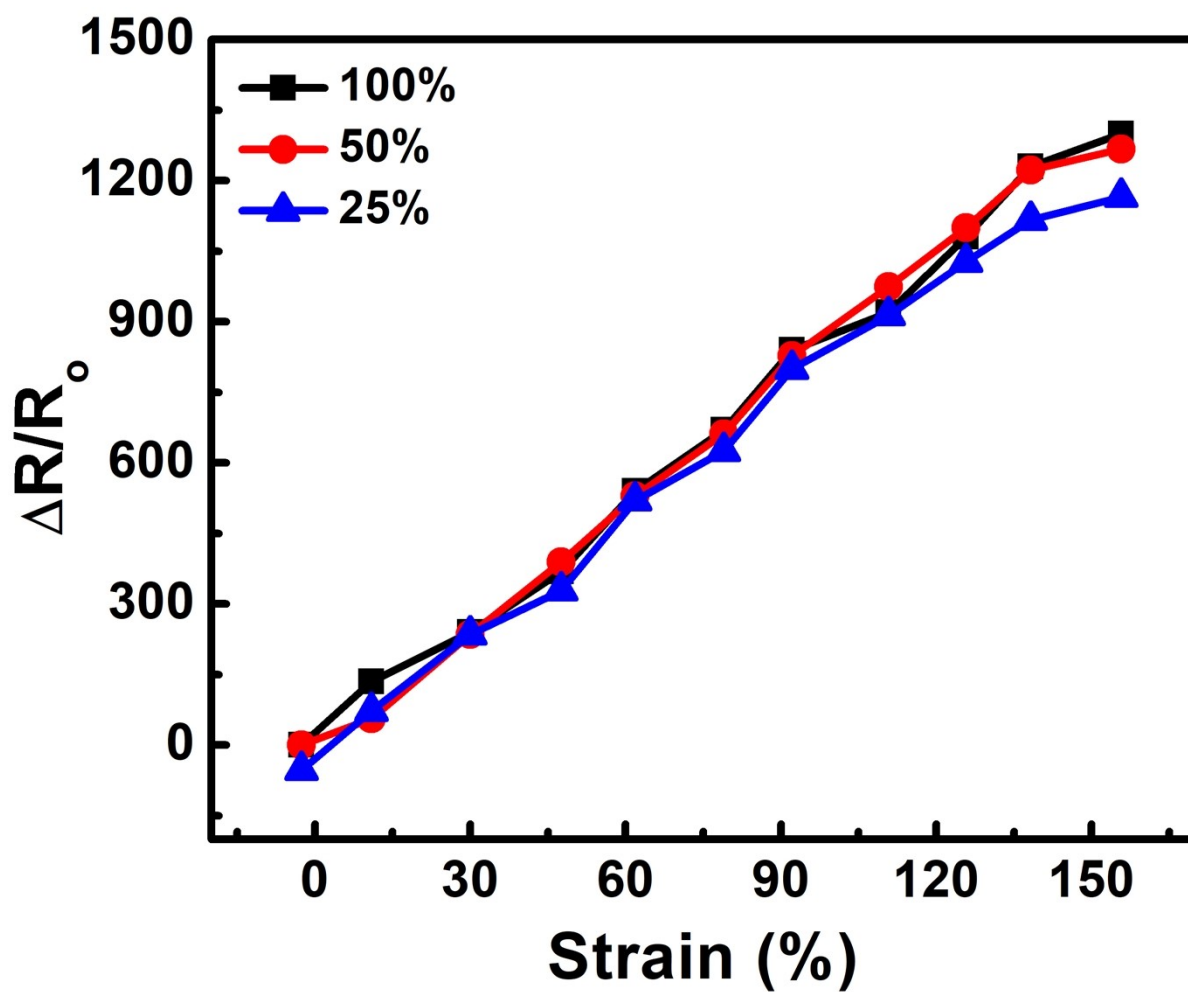

Fig. S9 Sensor's response when the LED is placed at different focus areas (25%, 50%, and 100%)

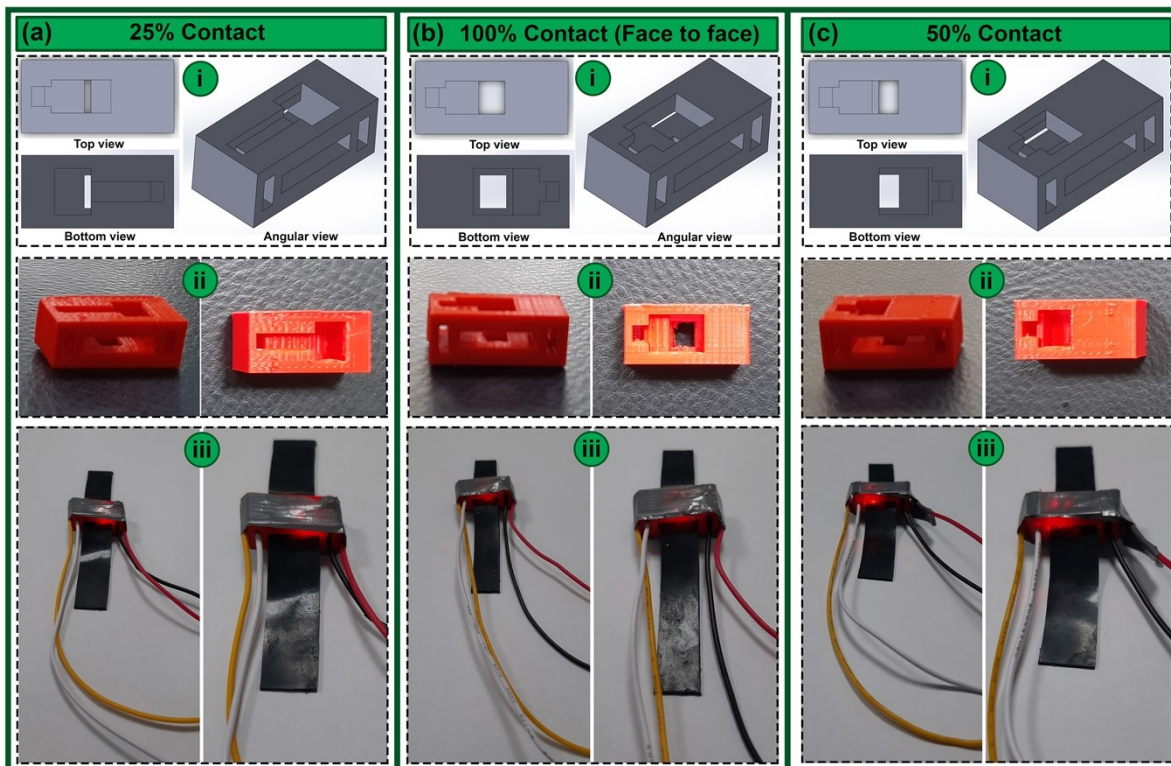

**Fig. S10** (a) Shows the 3D drawing of the case with 25% focus area covered and its setup, (b) with 100% focus area, and (c) 50% focus area.

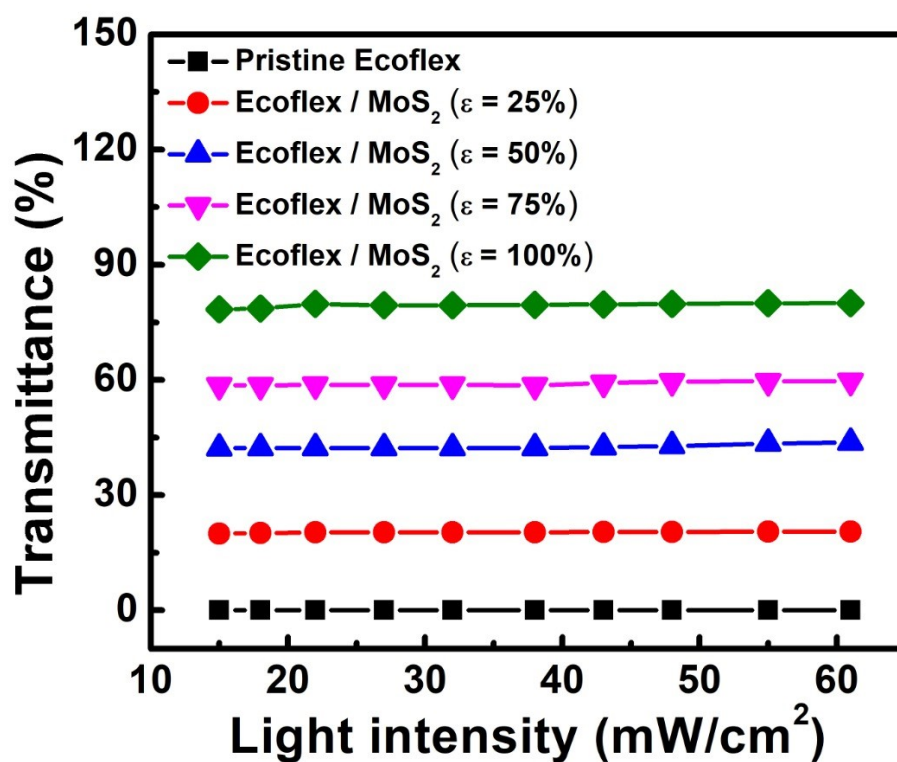

Fig. S11 Optical transmittance of the pristine Ecoflex and Ecoflex/MoS<sub>2</sub> when light intensity in the range of 12.5 – 52 mW/cm<sup>2</sup> was used.



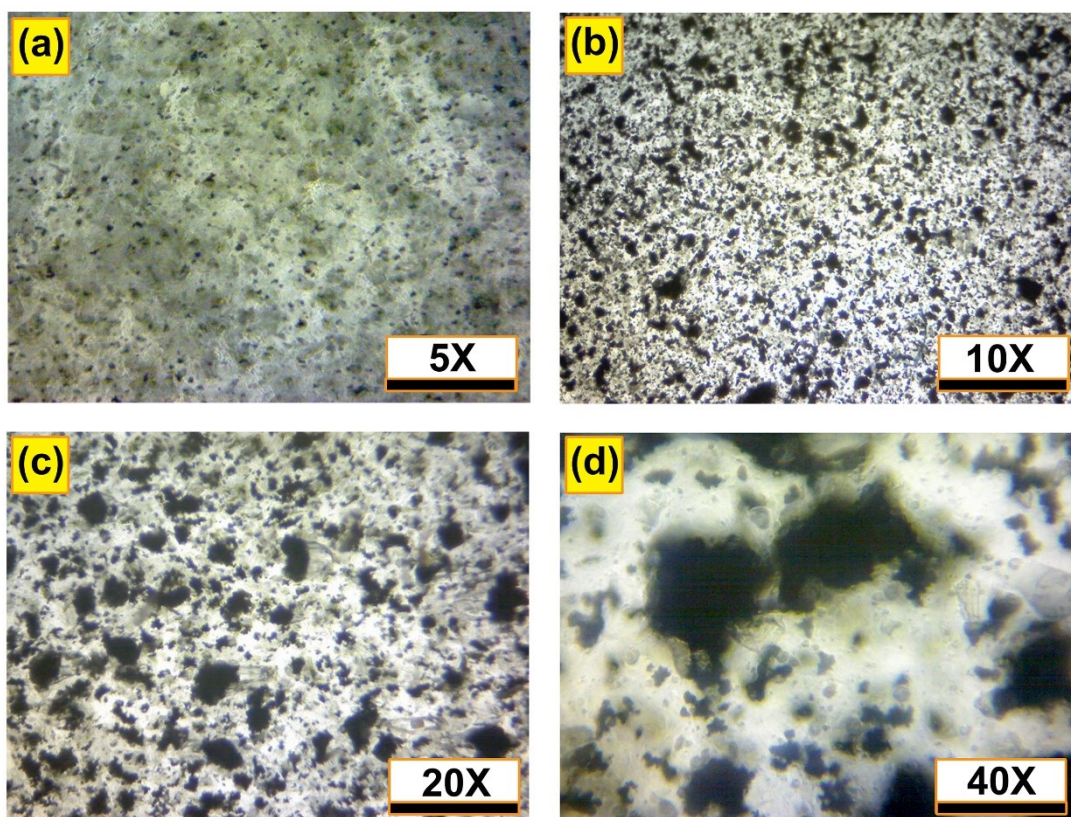

**Fig. S12** microscopic images of the prepared membrane under different magnification levels (5X, 10X, 20X, and 40X).

**Table S1** Comparison of performance parameters of the proposed device with reported devices

| Sensing Material              | Matrix Material | Sensing Range | Strain Frequency | DH (%) | GF     | Cycles | COD           | Technique    | Ref.          |
|-------------------------------|-----------------|---------------|------------------|--------|--------|--------|---------------|--------------|---------------|
| <b>GO-doped PU@PEDOT c</b>    | PU              | 550%          | --               | --     | 10.1   | 10000  | --            | Piezo Type   | <sup>1</sup>  |
| <b>GaInSn</b>                 | PDMS            | 50%           | --               | --     | --     | 20     | Almost linear | Liquid type  | <sup>2</sup>  |
| <b>CNT</b>                    | PDMS            | 300%          | --               | --     | 6.6    | 10000  | 0.9999        | Piezo Type   | <sup>3</sup>  |
| <b>NaCl-Ecoflex</b>           | Ecoflex         | 50%           | --               | 21.34% | --     | --     | ~0.999        | Liquid type  | <sup>4</sup>  |
| <b>Carbon grease solution</b> | Ecoflex         | 100%          | --               | 9.04%  | 3.8    | 1000   | Non-linear    | Liquid type  | <sup>5</sup>  |
| <b>multi-walled CNTs</b>      | PDMS            | 60%           | --               | --     | 1.16   | 255    | Non-linear    | Piezo Type   | <sup>6</sup>  |
| <b>KI-Gly</b>                 | Ecoflex         | 50%           | 2 Hz             | 5.3%   | 2.2    | 4000   | Almost linear | Liquid type  | <sup>7</sup>  |
| <b>Ethylene glycol/NaCl</b>   | Ecoflex         | 250%          | --               | 6.52%  | <4     | 3000   | ~0.989        | Liquid type  | <sup>8</sup>  |
| <b>PEDOT: PSS</b>             | PDMS            | 30%           | --               | ~9%    | 12,000 | --     | --            | Liquid type  | <sup>9</sup>  |
| <b>Graphene/ Glycerine</b>    | Ecoflex         | 1000%         | --               | --     | 45     | 10,000 | Almost linear | Liquid type  | <sup>10</sup> |
| <b>CNTs</b>                   | Ecoflex         | 100%          | --               | 1.8%   | 30     | --     | 0.98          | Piezo Type   | <sup>11</sup> |
| <b>rGO/DI</b>                 | Ecoflex         | 400%          | --               | 31.6%  | --     | --     | Almost linear | Liquid type  | <sup>12</sup> |
| <b>KCL-Gly</b>                | Ecoflex         | 100%          | 5 Hz             | 4.23%  | 2.7    | 8000   | ~0.99         | Piezo Type   | <sup>13</sup> |
| <b>PEDOT:PSS/M WCNT</b>       | Ecoflex         | 150%          | 10 Hz            | 1.56%  | 89.4   | 1000   | 0.99          | Liquid type  | <sup>14</sup> |
| <b>MOS<sub>2</sub></b>        | Ecoflex         | 150%          | 5 Hz             | 0.43%  | 8.6    | 1000   | 0.998         | Optical Type | This work     |

- 1 K. Qi, J. He, H. Wang, Y. Zhou, X. You, N. Nan, W. Shao, L. Wang, B. Ding and S. Cui, *ACS Appl. Mater. Interfaces*, 2017, **9**, 42951–42960.
- 2 A. Nakamura, T. Hamanishi, S. Kawakami and M. Takeda, *Mater. Sci. Eng. B Solid-State Mater. Adv. Technol.*, 2017, **219**, 20–27.
- 3 L. Cai, L. Song, P. Luan, Q. Zhang, N. Zhang, Q. Gao, D. Zhao, X. Zhang, M. Tu, F. Yang, W. Zhou, Q. Fan, J. Luo, W. Zhou, P. M. Ajayan and S. Xie, *Sci. Rep.*, 2013, **3**, 1–9.
- 4 J. Z. Gul, M. Sajid and K. H. Choi, *J. Mater. Chem. C*, , DOI:10.1039/c8tc03423k.
- 5 J. Luan, Q. Wang, X. Zheng, Y. Li and N. Wang, .
- 6 R. Iglio, S. Mariani, V. Robbiano, L. Strambini and G. Barillaro, *ACS Appl. Mater. Interfaces*, 2018, **10**, 13877–13885.
- 7 S. Xu, D. M. Vogt, W. H. Hsu, J. Osborne, T. Walsh, J. R. Foster, S. K. Sullivan, V. C. Smith, A. W. Rousing, E. C. Goldfield and R. J. Wood, *Adv. Funct. Mater.*, 2019, **29**, 1–14.
- 8 Y. Huang, Y. Zhao, W. Pan, Y. Zhang, X. Guo, L. Mao, P. Liu and L. Gao, *Smart Mater. Struct.*, 2017, **26**, 95017.
- 9 S. Zhu, J. H. So, R. Mays, S. Desai, W. R. Barnes, B. Pourdeyhimi and M. D. Dickey, *Adv. Funct. Mater.*, 2013, **23**, 2308–2314.
- 10 M. Xu, J. Qi, F. Li and Y. Zhang, *Nanoscale*, 2018, **10**, 5264–5271.
- 11 J. W. Lee, A. M. Soomro, M. Waqas, M. A. U. Khalid and K. H. Choi, *Int. J. Energy Res.*, 2020, **44**, 7035–7046.

- 12 X. Shi, C. H. Cheng, Y. Zheng and P. K. A. Wai, *J. Micromechanics Microengineering*, , DOI:10.1088/0960-1317/26/10/105020.
- 13 G. Hassan, J. Bae, A. Hassan, S. Ali, C. H. Lee and Y. Choi, *Compos. Part A Appl. Sci. Manuf.*, 2018, **107**, 519–528.
- 14 F. Jabbar, A. M. Soomro, J. Lee, M. Ali, Y. S. Kim, S. Lee and K. H. Choi, 2020, **32**, 1–17.
